# Supplementary material for: Glioblastoma Extracellular Vesicle-Specific Peptides Inhibit EV-Induced Neuronal Cytotoxicity
Source: MDPI journal article supplement (doi:10.3390/ijms23137200), 2022-06-28
Supplement: s1 [file s1]

# **Glioblastoma tumor extracellular vesicle specific peptides inhibit EV-induced neuronal cytotoxicity**

Wenbo Zhou<sup>#</sup>, Julia Craft<sup>#</sup>, Alex Ojemann, Luke Bergen, Arin Graner, Aitana Gonzales, Qianbin He, Timothy Kopper,

Marie Smith, Michael W. Graner\*, Xiaoli Yu\*<sup>§</sup>

Department of Neurosurgery, University of Colorado Anschutz Medical Campus, Aurora, CO, 80045.

## **Supplemental Tables**

- 1. Table S1: Subject demographics (summary)**
- 2. Table S2: GBM patient details**
- 3. Table S3: MMA patient details**
- 4. Table S4: Healthy control details**
- 5. Table S5: List of peptides identified**
- 6. Table S6: Peptide sequence alignments**
- 7. Table S7: List of peptides with homologies to known proteins**
- 8. Table S8: List of synthetic peptides**

**Supplemental Table S1. Summary of subject demographics**

| Diagnostic                 | Glioblastoma (GBM),<br>WHO Grade IV | Meningioma (MMA),<br>WHO Grade I | Healthy<br>Controls (HC)* |
|----------------------------|-------------------------------------|----------------------------------|---------------------------|
| Subject (n)                | 40                                  | 40                               | 20                        |
| Male (n)                   | 28                                  | 13                               | 6                         |
| Female (n)                 | 12                                  | 27                               | 14                        |
| Age (years, mean $\pm$ SD) | 55.4 $\pm$ 12.7                     | 55.3 $\pm$ 12.2                  | 45.2 $\pm$ 12.9           |

\*Additional healthy plasma were purchased from Innovative Research (<https://www.innov-research.com/products/pooled-human-plasma-blood-derived>): Pooled Human Plasma (Blood Derived).

**Supplemental Table S2. Pathology of GBM patients, sex, and age**

| ID   | Pathology                                                                                                                                                                                                                                                                                                                                                                      | Sex    | Age |
|------|--------------------------------------------------------------------------------------------------------------------------------------------------------------------------------------------------------------------------------------------------------------------------------------------------------------------------------------------------------------------------------|--------|-----|
| J5-1 | Glioblastoma: WHO grade 4<br>IDH wildtype<br>negative for MGMT promoter methylation<br>positive for point mutation in TERT promoter region<br>positive for EGFR amplification<br>negative for loss of PTEN                                                                                                                                                                     | Female | 67  |
| J6-7 | Diffuse astrocytoma: WHO grade 2<br>IDH1 mutant by IHC<br>negative for 1p36 deletion<br>negative for 19q13 deletion<br>polysomy and agin of 19q12 observed<br>negative for EGFR amplification<br>negative for loss of PTEN                                                                                                                                                     | Male   | 32  |
| J8-1 | Glioblastoma: WHO grade 4, with high cell density<br>IDH wildtype<br>negative for IDH1 R132H by IHC<br>positive for high level EGFR amplification<br>negative for whole chromosome 7 gain<br>positive for loss of PTEN, consistent with whole chromosome 10 loss<br>positive for point mutation in TERT promoter region (c.1-124C>T)<br>positive for MGMT promoter methylation | Female | 65  |

|       |                                                                                                                                                                                                                                                                                                                                                                                                                                                                                                                                                                                                                                                          |        |    |
|-------|----------------------------------------------------------------------------------------------------------------------------------------------------------------------------------------------------------------------------------------------------------------------------------------------------------------------------------------------------------------------------------------------------------------------------------------------------------------------------------------------------------------------------------------------------------------------------------------------------------------------------------------------------------|--------|----|
| J9-6  | <p>Glioblastoma: WHO grade 4<br/> IDH-wildtype<br/> negative for IDH1 R132H by IHC<br/> positive for high level EGFR amplification<br/> negative for whole chromosome 7 gain<br/> positive for loss of PTEN, consistent with whole chromosome 10 loss<br/> positive for MGMT promoter methylation<br/> positive for point mutation in TERT promoter region (c.1-146C &gt;T)<br/> negative for mutation in IDH1, IDH2, and BRAF<br/> positive for mutation in EGFR, anticipated single amino acid substitution (p.A289V)</p>                                                                                                                              | Female | 56 |
| J5-5  | <p>Glioblastoma: WHO grade 4, clinically recurrent<br/> IDH-wildtype<br/> positive for EGFR amplification<br/> positive for loss of PTEN<br/> indeterminate for MGMT</p>                                                                                                                                                                                                                                                                                                                                                                                                                                                                                 | Male   | 79 |
| J10-3 | <p>Glioblastoma: WHO grade 4, with sarcomatous areas (gliosarcoma)<br/> IDH-wildtype negative for IDH1 R132H by IHC<br/> positive for high level EGFR amplification<br/> negative for whole chromosome 7 gain<br/> positive for loss of PTEN, consistent with whole chromosome 10 loss<br/> negative for mutation in BRAF<br/> negative for mutation in IDH1 and IDH2<br/> negative for mutation in H3F3A<br/> positive for point mutation in TERT promoter region (c.1-124C&gt;T)<br/> negative for deletion of CDKN2A (p16) sequences<br/> positive for the presence of a KIAA1549-BRAF fusion product<br/> positive for MGMT promoter methylation</p> | Male   | 62 |

|       |                                                                                                                                                                                                                                                                                                                                                                                                                                                                                                                                                                                                                                                                                                                              |        |    |
|-------|------------------------------------------------------------------------------------------------------------------------------------------------------------------------------------------------------------------------------------------------------------------------------------------------------------------------------------------------------------------------------------------------------------------------------------------------------------------------------------------------------------------------------------------------------------------------------------------------------------------------------------------------------------------------------------------------------------------------------|--------|----|
| I21-6 | <p>Glioblastoma: WHO grade 4</p> <p>IDH-wildtype negative for IDH1 R132H by IHC</p> <p>rare cells with amplification of EGFR sequences</p> <p>trisomy for 7p/7cen sequences, consistent with whole chromosome 7 gain</p> <p>positive for loss of PTEN, consistent with whole chromosome 10 loss</p> <p>positive for MGMT promoter methylation</p> <p>positive for point mutation in TERT promoter region</p>                                                                                                                                                                                                                                                                                                                 | Female | 58 |
| I24-6 | <p>Glioblastoma: WHO grade 4, with extensive necrosis</p> <p>IDH-wildtype</p> <p>history of clinically residual glioblastoma, IDH-wildtype, WHO grade 4</p> <p>previous sample was positive for amplification of EGFR sequences</p> <p>positive for loss of PTEN, consistent with monosomy 10</p>                                                                                                                                                                                                                                                                                                                                                                                                                            | Female | 64 |
| I17-6 | <p>Glioblastoma: WHO grade 4, with primitive neuronal component</p> <p>IDH mutant; positive for IDH1 R132H by IHC</p> <p>negative for deletion of 1p36 sequences</p> <p>positive for deletion of 19q13 sequences</p> <p>negative for amplification of EGFR</p> <p>trisomy and tetrasomy for 7p/7cen sequences, consistent with whole chromosome gain of 7</p> <p>negative for loss of PTEN sequences and whole chromosome loss of 10;</p> <p>trisomy and tetrasomy for PTE, consistent with whole chromosome gain of 10</p> <p>positive for amplification of MYCN sequences</p> <p>positive for amplification of CMYC sequences</p> <p>MGMT promoter methylation not detected</p> <p>TERT promotor mutation not detected</p> | Female | 28 |

|       |                                                                                                                                                                                                                                                                                                                                                                                                                                                                                                                                      |        |    |
|-------|--------------------------------------------------------------------------------------------------------------------------------------------------------------------------------------------------------------------------------------------------------------------------------------------------------------------------------------------------------------------------------------------------------------------------------------------------------------------------------------------------------------------------------------|--------|----|
| I23-2 | <p>Glioblastoma: WHO grade 4, possibly arising in a ganglioglioma</p> <p>IDH-wildtype negative for IDH1 R132H by IHC</p> <p>negative for amplification of EGFR</p> <p>trisomy for 7p/7cen sequences, consistent with gain of whole chromosome 7</p> <p>positive for loss of PTEN consistent with whole chromosome 10 loss</p> <p>negative for MGMT promoter methylation</p> <p>negative for BRAF mutation</p> <p>positive for point mutation in TERT promoter region (c.1-124C&gt;T)</p> <p>positive for EGFR mutation (p.T263P)</p> | Male   | 43 |
| J12-4 | <p>Glioblastoma: WHO grade IV; history of a left temporal anaplastic astrocytoma</p> <p>IDH mutant</p> <p>MGMT methylation indeterminate</p> <p>very rare cells with EGFR amplification</p>                                                                                                                                                                                                                                                                                                                                          | Female | 56 |
| J12-2 | <p>Glioblastoma: WHO grade 4</p> <p>IDH-wildtype</p> <p>negative for IDH1 R132H by IHC</p> <p>negative for amplification of MYCN</p> <p>positive for trisomy and tetrasomy for chromosome 2</p> <p>negative for amplification of EGFR</p> <p>positive for multiple copies of 7p/7cen, consistent with whole chromosome 7 gain</p> <p>borderline for loss of PTEN and 10 centromere (monosomy 10)</p> <p>negative for MGMT promoter methylation</p> <p>positive for point mutation in TERT promoter region</p>                        | Male   | 60 |

|       |                                                                                                                                                                                                                                                                                                                                                                                                                                                                                                                    |      |    |
|-------|--------------------------------------------------------------------------------------------------------------------------------------------------------------------------------------------------------------------------------------------------------------------------------------------------------------------------------------------------------------------------------------------------------------------------------------------------------------------------------------------------------------------|------|----|
| J6-3  | <p>Glioblastoma: WHO grade 4 (clinically recurrent)</p> <p>IDH-wildtype</p> <p>negative for IDH1 IHC</p> <p>negative for amplification of EGFR</p> <p>positive for monosomy 10</p> <p>indeterminate MGMT methylation</p> <p>positive for TERT promotor mutations</p>                                                                                                                                                                                                                                               | Male | 42 |
| J3-6  | <p>Glioblastoma: WHO grade 4; clinically recurrent</p> <p>history of right parietal glioblastoma, IDH-wildtype, WHO grade 4</p> <p>positive for MGMT methylation</p> <p>high level amplification of EGFR sequences</p> <p>loss of PTEN, consistent with monosomy 10</p>                                                                                                                                                                                                                                            | Male | 58 |
| J3-1  | <p>Glioblastoma: WHO grade 4</p> <p>IDH-wildtype</p> <p>negative for IDH1 R132H by IHC</p> <p>negative for amplification of EGFR</p> <p>polysomy for 7p/7cen sequences, consistent with whole chromosome 7 gain</p> <p>negative for deletion of 19q13 sequences</p> <p>negative for loss of PTEN sequences or whole chromosome 10 loss</p> <p>negative for deletion of 1p36 sequences</p> <p>negative for MGMT promoter methylation</p> <p>positive for point mutation in TERT promoter region (c.1-124C&gt;T)</p> | Male | 80 |
| J1-6  | <p>Glioblastoma: WHO grade 4 +</p> <p>IDH-wildtype</p> <p>positive for EGFR amplification</p> <p>negative for whole chromosome 7 gain</p> <p>positive for monosomy 10</p>                                                                                                                                                                                                                                                                                                                                          | Male | 58 |
| I24-4 | <p>Glioblastoma: WHO grade 4 (clinically recurrent)</p> <p>IDH wildtype</p>                                                                                                                                                                                                                                                                                                                                                                                                                                        | Male | 56 |

|       |                                                                                                                                                                                                                                                                                                                                                                                                                                                                                                                                                                                                                                                                                                                                                                                                       |      |    |
|-------|-------------------------------------------------------------------------------------------------------------------------------------------------------------------------------------------------------------------------------------------------------------------------------------------------------------------------------------------------------------------------------------------------------------------------------------------------------------------------------------------------------------------------------------------------------------------------------------------------------------------------------------------------------------------------------------------------------------------------------------------------------------------------------------------------------|------|----|
| I24-3 | <p> Glioblastoma: WHO grade 4<br/> IDH-wildtype<br/> negative for IDH1/2 mutation<br/> negative for IDH1 R132H by IHC<br/> positive for mutation in H3F3A (p.G35R)<br/> negative for H3K27M by IHC<br/> strong diffuse p53 immunostaining<br/> loss of nuclear ATRX<br/> positive for amplification of EGFR sequences<br/> polysomy for 7p12 (EGFR) and 7cen sequences, consistent with whole chromosome 7 gain<br/> borderline for loss of PTEN and 10 centromere sequences<br/> negative for amplification of MYCN (2p24.1) sequences<br/> loss of MYCN (2p24.1) sequences<br/> negative for amplification of C-MYC sequences<br/> polysomy for 8q24 (C-MYC) and 8cen sequences<br/> negative for MGMT promoter methylation<br/> negative for point mutation in evaluated TERT promoter region </p> | Male | 33 |
| I21-1 | <p> Glioblastoma: WHO grade 4<br/> IDH-wildtype<br/> negative for 1p/19q deletion<br/> borderline for loss of 1p36 sequences<br/> negative for deletion of 19q13 sequences<br/> negative for amplification of EGFR<br/> trisomy and tetrasomy for 7p/7cen sequences, consistent with gain of whole chromosome 7<br/> positive for two populations with loss of PTEN sequences </p>                                                                                                                                                                                                                                                                                                                                                                                                                    | Male | 61 |



|       |                                                                                                                                                                                                                                                                                                                                                                              |        |    |
|-------|------------------------------------------------------------------------------------------------------------------------------------------------------------------------------------------------------------------------------------------------------------------------------------------------------------------------------------------------------------------------------|--------|----|
| I20-2 | <p>Glioblastoma: WHO grade 4, epithelioid<br/> IDH-wildtype<br/> negative for IDH1 R132H by IHC<br/> positive for amplification of EGFR sequences<br/> no evidence for gain of whole chromosome 7<br/> positive for loss of PTEN, consistent with loss of whole chromosome 10<br/> positive for point mutation in promoter region of TERT<br/> no BRAF mutation detected</p> | Male   | 59 |
| I18-1 | <p>Glioblastoma: WHO grade 4, clinically recurrent<br/> IDH-wildtype<br/> negative for IDH1 R132H by IHC<br/> positive for amplification of EGFR sequences<br/> negative for whole chromosome 7 gain<br/> positive for loss of PTEN, consistent with a loss of whole chromosome 10</p>                                                                                       | Male   | 56 |
| J3-3  | <p>Glioblastoma: WHO grade 4, recurrent; on clinical trial<br/> IDH wildtype</p>                                                                                                                                                                                                                                                                                             | Male   | 56 |
| I17-2 | <p>Glioblastoma: WHO grade 4<br/> IDH-wildtype<br/> negative for IDH1 R132H by IHC<br/> positive for amplification of EGFR sequences; no evidence of whole chromosome 7 gain<br/> positive for loss of PTEN, consistent with whole chromosome loss of 10<br/> positive for TERT promoter variant, c.1-124C&gt;T<br/> MGMT promoter methylation not detected</p>              | Male   | 46 |
| E17-5 | <p>GBM, according to Pathology</p>                                                                                                                                                                                                                                                                                                                                           | Male   | 57 |
| E19-6 | <p>Glioblastoma: WHO Grade IV, with oligodendroglial component, and acute hemorrhage<br/> IDH1 positive by IHC<br/> negative for 1;36 deletion<br/> negative for 19q13 deletion<br/> negative for EGFR amplification<br/> positive for loss of PTEN, consistent with monosomy 10</p>                                                                                         | Female | 32 |

|       |                                                                                                                                                                                                                                                                                                                            |        |    |
|-------|----------------------------------------------------------------------------------------------------------------------------------------------------------------------------------------------------------------------------------------------------------------------------------------------------------------------------|--------|----|
| E11-5 | Glioblastoma: WHO grade 4<br>negative for MGMT promoter methylation                                                                                                                                                                                                                                                        | Male   | 64 |
| E17-2 | GBM, according to Pathology                                                                                                                                                                                                                                                                                                | Female | 49 |
| E17-3 | GBM, according to Pathology                                                                                                                                                                                                                                                                                                | Male   | 70 |
| E19-6 | GBM, according to Pathology                                                                                                                                                                                                                                                                                                | Female | 32 |
| E12-2 | Glioblastoma: WHO grade 4<br>IDH wildtype<br>IDH-1 negative by IHC<br>positive for high level of EGFR amplification<br>loss of PTEN, consistent with monosomy 10<br>negative for MGMT methylation                                                                                                                          | Male   | 60 |
| I18-4 | Glioblastoma: Grade 4<br>point mutation in TERT promoter region                                                                                                                                                                                                                                                            | Male   | 64 |
| I17-7 | Glioblastoma: WHO grade 4<br>IDH-wildtype<br>negative for IDH1 R132H by IHC<br>positive for amplification of EGFR sequences<br>negative for whole chromosome 7 gain<br>positive for loss of PTEN, consistent with whole chromosome<br>loss of 10<br>TERT Promoter variant c.1-124C>T<br>MGMT promoter methylation detected | Male   | 65 |
| I17-5 | Glioblastoma: WHO grade 4 (clinically recurrent)<br>IDH-wildtype<br>prior resection specimen negative for MGMT methylation<br>positive for TERT promoter mutation<br>positive for EGFR amplification                                                                                                                       | Female | 58 |
| E17-4 | GBM, according to Pathology                                                                                                                                                                                                                                                                                                | Female | 66 |
| E13-7 | Glioblastoma: WHO grade 4, with epithelioid features<br>negative for MGMT methylation<br>negative for EGFR amplification<br>borderline positive for PTEN loss, consistent with monosomy<br>10                                                                                                                              | Male   | 36 |

|       |                                                                                                                                                                                                                                                                                                                                                                                                                                                                                                                                             |      |    |
|-------|---------------------------------------------------------------------------------------------------------------------------------------------------------------------------------------------------------------------------------------------------------------------------------------------------------------------------------------------------------------------------------------------------------------------------------------------------------------------------------------------------------------------------------------------|------|----|
| E13-1 | <p>Glioblastoma: WHO grade 4</p> <p>IDH wildtype</p> <p>IDH1 negative by IHC</p> <p>IDH1 negative for mutation</p> <p>strong nuclear p53 IHC</p> <p>strong EGFR expression</p> <p>positive for amplification of EGFR sequences</p> <p>negative for loss of PTEN sequences</p> <p>MGMT methylation detected</p>                                                                                                                                                                                                                              | Male | 56 |
| E11-1 | <p>Glioblastoma: WHO grade 4</p> <p>IDH wildtype</p> <p>IDH1 negative by IHC</p> <p>positive for EGFR amplification</p> <p>negative for PTEN loss</p> <p>MGMT methylation not detected</p>                                                                                                                                                                                                                                                                                                                                                  | Male | 74 |
| J13-6 | <p>Glioblastoma: WHO grade 4, clinically recurrent right temporal glioblastoma</p> <p>IDH-wildtype</p> <p>negative for IDH1 R132H by IHC</p> <p>positive for amplification of EGFR sequences</p> <p>positive for loss of PTEN, consistent with monosomy 10</p> <p>MGMT promoter methylation not detected</p> <p>no fusion or potentially oncogenic transcripts identified in ALK, ROS1 or MET</p> <p>EGFR-SEPT14 fusion transcript identified [EGFR exon 24 to SEPT14 exon 10]</p> <p>TERT promoter variant identified (c.1-124C&gt;T).</p> | Male | 51 |
| J13-3 | <p>Glioblastoma: WHO grade 4</p> <p>positive for EGFR amplification</p> <p>positive for loss of PTEN consistent with whole chromosome 10 loss</p>                                                                                                                                                                                                                                                                                                                                                                                           | Male | 56 |

|       |                                                                                                                                                                                                                                                      |      |    |
|-------|------------------------------------------------------------------------------------------------------------------------------------------------------------------------------------------------------------------------------------------------------|------|----|
| E20-7 | Anaplastic astrocytoma: WHO grade 3, clinically gliomatosis cerebri by history<br>IDH wildtype<br>IDH1 IHC negative<br>IDH1, exon 4: no mutation detected<br>IDH2, exon 4: no mutation detected<br>EGFR protein expression negative<br>ATRX retained | Male | 50 |
|-------|------------------------------------------------------------------------------------------------------------------------------------------------------------------------------------------------------------------------------------------------------|------|----|

**Supplemental Table S3. MMA patient ID, pathology, sex and age**

| ID    | Pathology                                                                 | Sex    | Age |
|-------|---------------------------------------------------------------------------|--------|-----|
| J11-2 | Meningioma: WHO grade 1                                                   | Female | 58  |
| J11-7 | Meningioma: WHO grade 1                                                   | Male   | 59  |
| J10-7 | Meningioma: WHO grade 1                                                   | Male   | 48  |
| J10-6 | Meningioma: WHO grade 1; point mutation in TERT promoter region           | Male   | 55  |
| J8-6  | Meningioma: WHO grade 1                                                   | Female | 43  |
| J9-3  | Meningioma: WHO grade 1                                                   | Female | 70  |
| J4-7  | Meningioma: WHO grade 1                                                   | Female | 36  |
| J7-5  | Meningioma: WHO grade 1                                                   | Female | 46  |
| J7-6  | Meningioma: WHO grade 1                                                   | Female | 58  |
| J6-2  | Meningioma: WHO grade 1                                                   | Female | 57  |
| E6-4  | Meningioma; recurrent                                                     | Female | 75  |
| E6-1  | Meningioma: WHO grade 1                                                   | Female | 36  |
| E8-3  | Meningioma: WHO grade 1; angiomatous variant with focal atypical features | Male   | 63  |
| E5-3  | Meningioma: WHO grade 1                                                   | Female | 64  |
| I22-6 | Meningioma: WHO grade 1                                                   | Female | 48  |
| I19-2 | Meningioma: WHO grade 1                                                   | Female | 53  |
| J4-7  | Meningioma: WHO grade 1                                                   | Female | 36  |
| J4-1  | Meningioma: WHO grade 1                                                   | Female | 64  |
| I20-7 | Meningioma: WHO grade 1                                                   | Male   | 74  |
| J1-4  | Meningioma: WHO grade 1; extensive transdural and dural sinus involvement | Female | 39  |
| E4-6  | Meningioma: WHO grade 1                                                   | Female | 62  |
| E8-1  | Meningioma: WHO grade 1                                                   | Female | 53  |
| E8-2  | Meningioma: WHO grade 2 (atypical)                                        | Male   | 41  |

|       |                                                       |        |    |
|-------|-------------------------------------------------------|--------|----|
| J3-2  | Meningioma: WHO grade 1; clinically radiation-induced | Male   | 74 |
| J2-2  | Meningioma: WHO grade 1                               | Female | 65 |
| I18-5 | Meningioma: WHO grade 1                               | Female | 37 |
| J4-4  | Meningioma: WHO grade 1                               | Male   | 67 |
| J11-6 | Meningioma: WHO grade 1                               | Female | 57 |
| I15-5 | Meningioma: WHO grade 1                               | Female | 43 |
| I20-4 | Meningioma: WHO grade 1                               | Male   | 66 |
| E4-5  | Meningioma: WHO grade 1                               | Male   | 74 |
| E15-6 | Meningioma: WHO grade 1                               | Female | 43 |
| E6-2  | Meningioma: WHO grade 1; psammomatous type            | Male   | 37 |
| I18-2 | Meningioma: WHO grade 1                               | Female | 55 |
| I24-2 | Meningioma, WHO grade I                               | Female | 75 |
| J5-7  | Meningioma: WHO grade 1; no TERT mutation found       | Female | 51 |
| J4-2  | Meningioma: WHO grade 1                               | Female | 49 |
| J10-2 | Meningioma: WHO grade 1                               | Male   | 64 |
| I19-3 | Meningioma: WHO grade 1                               | Female | 53 |
| I21-4 | Meningioma: WHO grade 1; psammomatous subtype         | Female | 63 |

**Supplemental Table S4. Healthy Control ID, sex and age**

| Healthy Control ID | Sex | Age |
|--------------------|-----|-----|
| ACP-HC1            | F   | 51  |
| ACP-HC2            | F   | 54  |
| ACP-HC3            | F   | 29  |
| ACP-HC4            | F   | 43  |
| ACP-HC5            | F   | 24  |
| ACP-HC6            | F   | 23  |
| ACP-HC7            | F   | 44  |
| ACP-HC8            | F   | 61  |
| ACP-HC9            | F   | 30  |
| ACP-HC10           | F   | 57  |
| ACP-HC11           | F   | 55  |
| ACP-HC12           | F   | 54  |
| ACP-HC13           | F   | 49  |
| ACP-HC14           | F   | 43  |
| ACP-HC15           | M   | 61  |
| ACP-HC16           | M   | 57  |
| ACP-HC17           | M   | 40  |

**Supplemental Table S5. Phage peptides identified by brain tumor EVs**

| EV ID                 | Phage ID  | Peptide      | EV ID                 | Phage ID    | Peptide       |
|-----------------------|-----------|--------------|-----------------------|-------------|---------------|
| GBM pooled plasma EVs | JC1a/C2   | SKADWNMAEAYF | MMA pooled plasma EVs | JC1a/D2     | FETTVLMDLYRY  |
|                       | JC1a/C3   | NHAHYLGALLST |                       | JC1a/D11    | YLDAHFYSEGAK  |
|                       | JC1a/C5   | MLPIKQEYHFPI |                       | JC1a/D7     | SNTWTWISSAYG  |
|                       | JC1a/C6   | TILKPAAQGFAD |                       | JC1a/D9     | FAKPDMRSNLGW  |
|                       | JC1a/C7   | AEAXTGFSASGV |                       | JC1a/D10    | VNASDFDFSRRK  |
|                       | JC1a/C8   | AEAWTGFSASGV | MMA plasma EVs        | JC1a/E2     | SIVKTHTQIDIF  |
|                       | JC1a/C9   | AEAWTGFSASGV |                       | JC1a/E3     | YSPVLIW       |
|                       | JC1a/C12  | AEAWTGFSASGV |                       | JC1a/E4     | QQMHEWYFQSLP  |
| GBM plasma EVs        | JC1a/F1   | GWNEAVNLMDSM |                       | JC1a/E6     | DHAMHQNQNISN  |
|                       | JC1a/F3   | SHYQGNHVDNKL |                       | JC1a/F7     | SHWGS DHQSVMT |
|                       | JC1a/F4   | LMPVTPK      |                       | JC1a/F12    | SHYQGNHVDNKL  |
|                       | JC1a/F5   | NHAHYLGALLST |                       | JC1a/F9     | QMYGLNIGGSWT  |
|                       | JC1a/F6   | TMVLAYDKTADI |                       | JC1a/F10    | NHAHYLGALLST  |
|                       | JC1a/E9   | TILKPAAQGFAD |                       | JC1a/F11    | DVSAILYRSGFP  |
|                       | JC1a/E7   | TILKPAAQGFAD | MMA cell line EVs     | E9-2MF1.G10 | VHWDFRQWWQPS  |
|                       | JC1a/E8   | NDIITSEQFKQG |                       | E9-2MF2.C8  | VHWDFRQWWQPS  |
|                       | JC1a/E10  | ISYDRGSFEAQS |                       | E9-2MF1.A9  | VHWDFRQWWQPS  |
|                       | JC1a/E11  | WAGLVSWMPNFS |                       | E9-2MF2.B9  | IGRMVTLEPGVM  |
|                       | JC1a/E12  | TPSSDNYLRTHN |                       | E9-2MF2.B10 | FEVNGTDHLPIH  |
| GBM cell line EVs     | F3-8 JC1a | HQMMLQAQPVKN |                       | E9-2MF2.C9  | IRNHVETINAGI  |
|                       | F3-8 SF1  | HLYALMT      |                       | E9-2MF2.H9  | SFDDNVGQPPSP  |
|                       | F3-8 JC1a | WIPRFTD      |                       | E9-2MF2.H10 | HFVPLVNLGVLS  |



Supplemental Table S6. For EVs derived from similar sources, EV-binding peptides reveal conserved sequences (<https://www.ebi.ac.uk/Tools/msa/clustalo/> )

|                       |                                                                   |
|-----------------------|-------------------------------------------------------------------|
| GBM pooled plasma EVs |                                                                   |
| JC1a/C7               | AEAXTGFSA <sup>red</sup> SGV <sup>green</sup>                     |
| JC1a/C8               | AEAWTGFSA <sup>red</sup> SGV <sup>green</sup>                     |
| JC1a/C9               | AEAWTGFSA <sup>red</sup> SGV <sup>green</sup>                     |
| JC1a/C12              | AEAWTGFSA <sup>red</sup> SGV <sup>green</sup>                     |
| *** *****             |                                                                   |
| GBM plasma EVs        |                                                                   |
| JC1a/F6               | -TMV <sup>red</sup> ---LAYDKTADI <sup>red</sup>                   |
| JC1a/E9               | -TILK <sup>red</sup> --PAAQGFAD <sup>red</sup> -                  |
| JC1a/E7               | -TILK <sup>red</sup> --PAAQGFAD <sup>red</sup> -                  |
| JC1a/E8               | NDIITSEQFKQ <sup>red</sup> G----                                  |
| :: :                  |                                                                   |
| MMA pooled plasma EVs |                                                                   |
| JC1a/D9               | FAKPD <sup>red</sup> M <sup>red</sup> RSN <sup>red</sup> LGW----- |
| JC1a/D7               | -----SNTWTWISSAYG <sup>red</sup>                                  |
| JC1a/D2               | FETT <sup>red</sup> VLMDLY <sup>red</sup> RY-----                 |
| JC1a/D11              | -----YLD <sup>red</sup> AHFYSEGAK <sup>red</sup> -                |
| JC1a/D10              | -----VNASDF <sup>red</sup> DFS <sup>red</sup> RKK <sup>red</sup>  |
| . :                   |                                                                   |
| MMA plasma EVs        |                                                                   |
| JC1a/E6               | DHAMHQNQN <sup>red</sup> ISN--                                    |
| JC1a/F7               | --SHWGS <sup>red</sup> DHQSVMT <sup>red</sup>                     |
| JC1a/F12              | --SHYQGNHVDN <sup>red</sup> KL <sup>red</sup>                     |
| JC1a/F9               | --QMYGLNIGGSWT <sup>red</sup>                                     |
| : .                   |                                                                   |

**Supplemental Table S7. BLAST searches of peptide sequences showing homologies to known proteins**

| Peptide ID         | Peptide sequence | Protein name                                                           | Identity   | Protein name                                                                              | Identity  |
|--------------------|------------------|------------------------------------------------------------------------|------------|-------------------------------------------------------------------------------------------|-----------|
| GBM cell line XO-1 | HLYALMT          | focal adhesion kinase 1 isoform X1                                     | 5/6(83%)   | phosphatidylinositol 4,5-bisphosphate 3-kinase catalytic subunit delta isoform isoform X1 | 5/6(83%)  |
| GBM cell line XO-2 | HTWLHAVQPRFA     | immunoglobulin heavy chain junction region                             | 7/9(78%)   | autism susceptibility gene 2 protein isoform X1                                           | 6/9(67%)  |
| GBM cell line XO-4 | HQMMLQAQPVKN     | atrophin-1 related protein                                             | 7/9(78%)   | arginine-glutamic acid dipeptide (RE) repeats, isoform CRA_b                              | 7/9(78%)  |
| GBM cell line XO-5 | WIPRFTD          | immunoglobulin heavy chain variable region, partial                    | 5/5(100%)  | deleted in malignant brain tumors 1 protein isoform e precursor                           | 6/7(86%)  |
| GBM PI-2           | VHWDFRQWWQPS     | immunoglobulin heavy chain junction region                             | 5/7(71%)   | anti-HIV-1 immunoglobulin heavy chain variable region, partial                            | 5/6(83%)  |
| GBM PXO            | GPRPSDLTMATR     | serine/threonine-protein phosphatase 4 regulatory subunit 1 isoform X1 | 9/14(64%)  | immunoglobulin heavy chain junction region                                                | 7/9(78%)  |
| GBM PPXO           | SKADWNMAEAYF     | immunoglobulin heavy chain junction region                             | 7/8(88%)   | sodium/hydrogen exchanger 10 isoform 1                                                    | 6/7(86%)  |
| GBM PPXO JC1a/C3   | NHAHYLGALLST     | probable E3 ubiquitin-protein ligase HERC1 isoform X1                  | 7/8(88%)   | teneurin-4 isoform X1                                                                     | 6/6(100%) |
| GBM PPXO JC1a/C5   | MLPIKQEYHFPI     | leucine-rich repeat transmembrane protein FLRT1                        | 10/20(50%) | immunoglobulin light chain junction region                                                | 5/7(71%)  |
| GBM PPXO JC1a/C6   | TILKPAAQGFAD     | TPA_inf: olfactory receptor OR17-8                                     | 8/10(80%)  | immunoglobulin heavy chain junction region                                                | 7/8(88%)  |

|                       |              |                                                                                  |           |                                                                                             |           |
|-----------------------|--------------|----------------------------------------------------------------------------------|-----------|---------------------------------------------------------------------------------------------|-----------|
| GBM PPXO<br>JC1a/C7   | AEAXTGFSASGV | immunoglobulin heavy<br>chain junction region<br>[Homo sapiens]                  | 7/10(70%) | ATPase WRNIP1 isoform 1<br>[Homo sapiens]                                                   | 8/11(73%) |
| GBM PXO               | SIVKHTQIDIF  | MHC class I antigen,<br>partial                                                  | 7/8(88%)  | oxysterol-binding protein-related<br>protein 10 isoform X4                                  | 8/11(73%) |
| GBM PXO<br>JC1a/E10   | ISYDRGSFEAQS | immunoglobulin heavy<br>chain junction region                                    | 7/9(78%)  | GTP-binding protein REM 1<br>isoform X1                                                     | 7/9(78%)  |
| GBM PXO<br>JC1a/E11   | WAGLVSWMPNFS | arachidonate 12-<br>lipoxygenase, 12R-type                                       | 5/5(100%) | immunoglobulin heavy chain<br>junction region                                               | 5/6(83%)  |
| GBM PXO<br>JC1a/E12   | TPSSDNYLRTHN | immunoglobulin heavy<br>chain junction region                                    | 7/9(78%)  | dmX-like protein 1 isoform X1                                                               | 6/6(100%) |
| GBM PXO<br>JC1a/E3    | YSPVLIW      | protein transport protein<br>Sec16A isoform X1                                   | 6/6(100%) | immunoglobulin heavy chain<br>junction region                                               | 6/7(86%)  |
| GBM PXO<br>JC1a/E4    | QQMHEWYFQSLP | mitogen-activated<br>protein kinase kinase<br>kinase 15                          | 6/7(86%)  | immunoglobulin heavy chain<br>junction region                                               | 5/6(83%)  |
| GBM PXO<br>JC1a/E6    | DHAMHQNQNISN | alternative protein<br>DIRAS2 [Homo sapiens]                                     | 6/11(55%) | chromodomain-helicase-DNA-<br>binding protein 9 isoform X1                                  | 5/6(83%)  |
| GBM PXO<br>JC1a/E8    | NDIITSEQFKQG | PDS5, regulator of<br>cohesion maintenance,<br>homolog A                         | 6/8(75%)  | BAH and coiled-coil domain-<br>containing protein 1 isoform 1                               | 6/6(100%) |
| MMA cell line<br>XO-2 | SFDDNVGQPPSP | aprataxin and PNK-like<br>factor                                                 | 6/7(86%)  | Structure of CHD4 double<br>chromodomains depicts<br>cooperative folding for DNA<br>binding | 6/6(100%) |
| MMA cell line<br>XO-3 | FEVNGTDHLPIH | serine/threonine-protein<br>phosphatase 6 regulatory<br>ankyrin repeat subunit C | 6/7(86%)  | immunoglobulin heavy chain<br>junction region                                               | 6/8(75%)  |
| MMA cell line<br>XO-4 | IRNHVETINAGI | very-long-chain (3R)-3-<br>hydroxyacyl-CoA<br>dehydratase 3                      | 7/8(88%)  | dynein, axonemal, heavy<br>polypeptide 7, isoform CRA_b                                     | 8/11(73%) |

|                    |              |                                                     |           |                                                                                    |           |
|--------------------|--------------|-----------------------------------------------------|-----------|------------------------------------------------------------------------------------|-----------|
| MMA cell line XO-5 | HFVPLVNLGVLS | tumor necrosis factor alpha-induced protein 3       | 7/8(88%)  | Peripherin 2 (retinal degeneration, slow)                                          | 9/14(64%) |
| MMA cell line XO-6 | IGRMVTLEPGVM | immunoglobulin heavy chain junction region          | 7/8(88%)  | zinc finger protein 469                                                            | 7/10(70%) |
| MMA PPXO           | FETTVLMDLYRY | methylcytosine dioxygenase TET2 isoform a           | 6/6(100%) | fetal liver non-specific cross-reactive antigen-3 precursor protein [Homo sapiens] | 6/7(86%)  |
| MMA PPXO JC1a/D10  | VNASDFDFSRKK | immunoglobulin heavy chain junction region          | 7/8(88%)  | inaD-like protein isoform X1                                                       | 6/7(86%)  |
| MMA PPXO JC1a/D11  | YLDAHFYSEGAK | immunoglobulin heavy chain junction region          | 6/6(100%) | autophagy-related protein 2 homolog A isoform X1                                   | 7/9(78%)  |
| MMA PPXO JC1a/D7   | SNTWTWISSAYG | immunoglobulin heavy chain variable region, partial | 7/9(78%)  | IG c804_heavy_IGHV4-39_IGHD6-13_IGHJ4, partial                                     | 6/7(86%)  |
| MMA PPXO JC1a/D9   | FAKPDMRSNLGW | protein AHNAK2 isoform 1 [Homo sapiens]             | 7/8(88%)  | immunoglobulin light chain junction region [Homo sapiens]                          | 6/6(100%) |
| MMA PXO            | GWNEAVNLMDSM | histone H2B type F-M isoform X1 [Homo sapiens]      | 7/9(78%)  | PRKC, apoptosis, WT1, regulator, isoform CRA_a                                     | 7/8(88%)  |
| MMA PXO JC1a/F11   | DVSAILYRSGFP | Rh-associated glycoprotein [Homo sapiens]           | 7/9(78%)  | 50 kDa erythrocyte plasma membrane glycoprotein [Homo sapiens]                     | 7/9(78%)  |
| MMA PXO JC1a/F3    | SHYQGNHVDNKL | immunoglobulin heavy chain junction region          | 8/11(73%) | cytochrome P450 27C1 isoform 2                                                     | 6/6(100%) |
| MMA PXO JC1a/F4    | LMPVTPK      | serine/threonine-protein kinase D3                  | 6/6(100%) | PRKD3 protein                                                                      | 6/6(100%) |
| MMA PXO JC1a/F6    | TMVLAYDKTADI | E3 ubiquitin-protein ligase MARCHF9 precursor       | 8/10(80%) | membrane-associated ring finger (C3HC4) 9, isoform CRA_b                           | 8/10(80%) |
| MMA PXO JC1a/F9    | QMYGLNIGGSWT | immunoglobulin heavy chain junction region          | 7/10(70%) | armadillo repeat containing, X-linked 4, isoform CRA_a                             | 6/6(100%) |

**Notes:**

**ppXO: Pooled plasma EVs**

**pXO: Individual plasma EVs**

**PI: Plasma**

**Supplemental Table S8. List of synthetic peptides with high affinity to corresponding EVs**

| Pep ID       | Sequence (N--C) | Molecular Weight | Water Solubility | Notes                               |
|--------------|-----------------|------------------|------------------|-------------------------------------|
| GBM PPXO C2  | SKADWNMAEAYF    | 1772             | Poor             | EVs from GBM pooled plasma          |
| GBM PPXO E5  | GPRPSDLTMATR    | 1641             | Poor             | EVs from GBM pooled plasma          |
| MMA-D2       | FETTVLMDLYRY    | 1550             | Poor             | EVs from meningioma pooled plasma   |
| MMA JC1A/D11 | YLDAHFYSEGAK    | 1440             | Good             | EVs from patient plasma             |
| F3-8 JC1A/B4 | WIPRFTD         | 934              | Good             | Surface pan. EVs from GBM cell line |
| F3-8 (SF1)F5 | HLYALMT         | 1073             | Poor             | Surface pan. EVs from GBM cell line |
| HC-XO G1     | LVVPHRSLSEVR    | 1391             | Good             | EVs from commercial HC plasma       |
| HC-XO G4     | FSGLSLTRMFYK    | 1449             | Poor             | EVs from commercial HC plasma       |
